# Supplementary material for: An Efficient Processing Strategy to Improve the Flavor Profile of Egg Yolk: Ozone-Mediated Oxidation
Source: MDPI journal article supplement (doi:10.3390/molecules28010124), 2022-12-23
Supplement: s1 [file s1]

## Supplementary Data

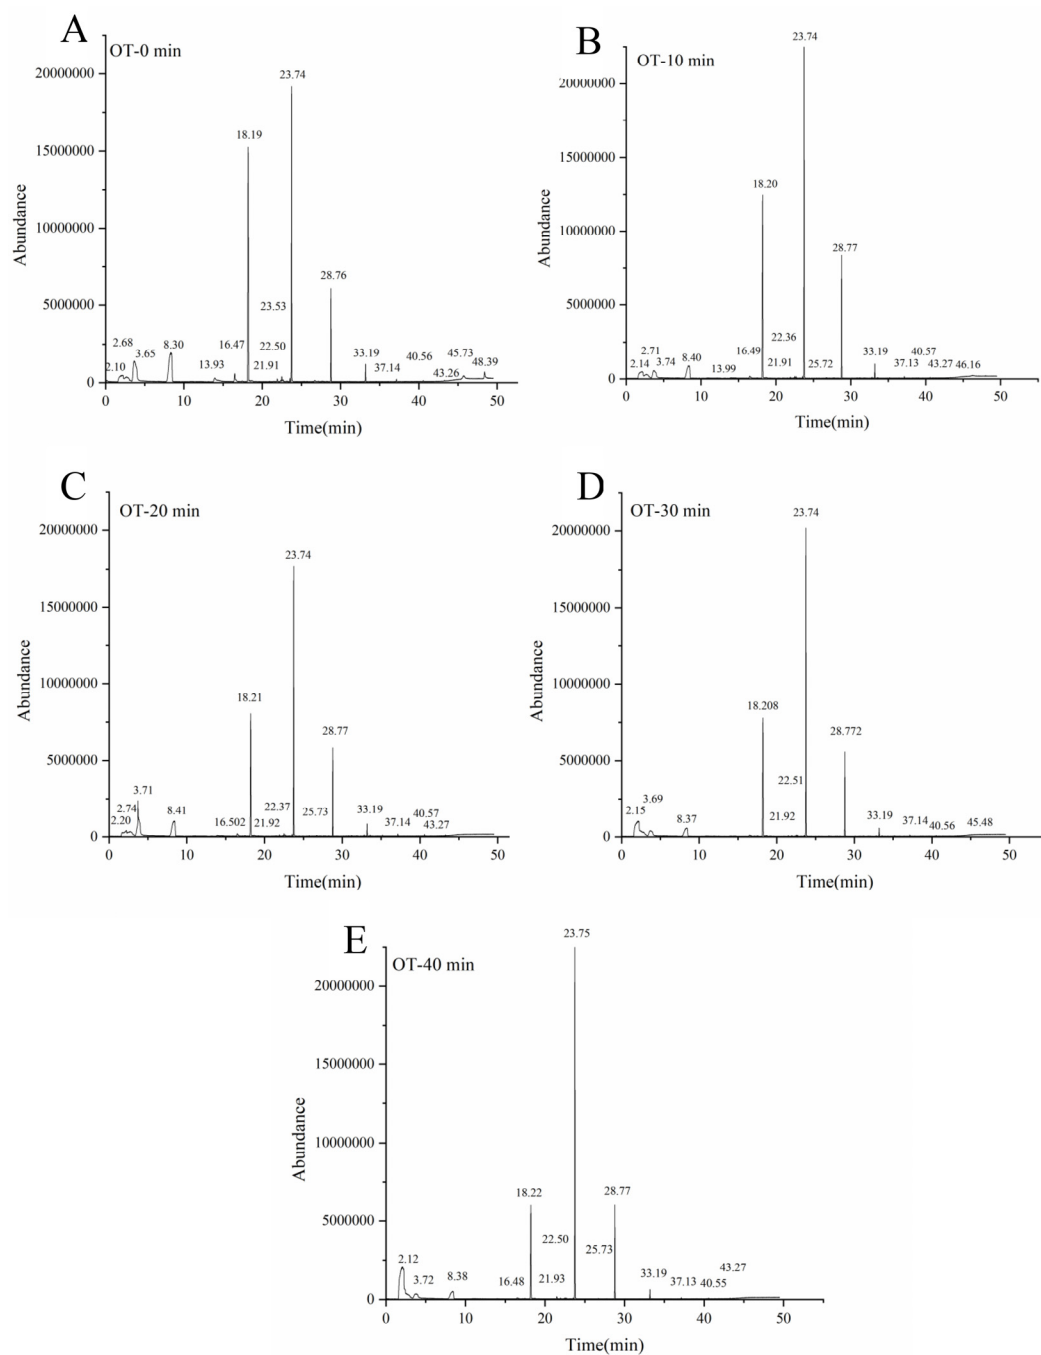

**Figure S1.** Total ion flow of egg yolk volatiles under different ozone treatment times.

A, 0 min; B, 10 min; C, 20 min; D, 30 min; E, 40 min.

**Table S1.** Fraction and relative content of volatile substances in egg yolk under different ozone treatment times

| Peak number | Volatile compounds                 | RT*   | Relative content of volatiles (%) |                         |                         |                         |                         |
|-------------|------------------------------------|-------|-----------------------------------|-------------------------|-------------------------|-------------------------|-------------------------|
|             |                                    |       | 0 min                             | 10 min                  | 20 min                  | 30 min                  | 40 min                  |
|             | Alkanes                            |       |                                   |                         |                         |                         |                         |
| 1           | Hexane                             | 2.68  | 1.73±0.24 <sup>a</sup>            | 0.22±0.14 <sup>b</sup>  | 0.21±0.12 <sup>b</sup>  | nd                      | nd                      |
| 2           | Hexadecane                         | 45.73 | 1.28±0.29 <sup>a</sup>            | 0.32±0.13 <sup>b</sup>  | 0.02±0.02 <sup>c</sup>  | nd                      | nd                      |
|             | Total content                      |       | 3.01                              | 0.54                    | 0.23                    | —                       | —                       |
|             | Terpenoids                         |       |                                   |                         |                         |                         |                         |
| 3           | Levomethol                         | 26.67 | 0.15±0.06 <sup>a</sup>            | 0.04±0.00 <sup>c</sup>  | 0.13±0.07 <sup>a</sup>  | 0.02±0.01 <sup>c</sup>  | 0.07±0.04 <sup>b</sup>  |
| 4           | Cedrene                            | 43.26 | 0.05±0.00 <sup>a</sup>            | 0.05±0.03 <sup>a</sup>  | 0.05±0.02 <sup>a</sup>  | 0.04±0.03 <sup>a</sup>  | 0.04±0.00 <sup>a</sup>  |
|             | Total content                      |       | 0.20                              | 0.09                    | 0.18                    | 0.06                    | 0.11                    |
|             | Aldehydes                          |       |                                   |                         |                         |                         |                         |
| 5           | Pentanal                           | 2.10  | 1.90±1.15 <sup>e</sup>            | 2.18±1.36 <sup>d</sup>  | 12.95±4.15 <sup>c</sup> | 14.90±8.93 <sup>b</sup> | 37.64±2.40 <sup>a</sup> |
| 6           | Hexanal                            | 8.30  | 19.47±4.73 <sup>a</sup>           | 11.11±1.26 <sup>b</sup> | 9.35±1.35 <sup>c</sup>  | 6.90±2.94 <sup>d</sup>  | 9.49±2.43 <sup>c</sup>  |
| 7           | Heptanal                           | 13.93 | 1.24±0.65                         | 0.14±0.10               | nd                      | nd                      | nd                      |
| 8           | Octanal                            | 18.19 | 27.35±1.57 <sup>b</sup>           | 28.28±0.38 <sup>a</sup> | 22.38±1.75 <sup>c</sup> | 21.35±3.61 <sup>d</sup> | 14.30±1.00 <sup>e</sup> |
| 9           | 2,5-Dihydroxybenzaldehyde          | 22.36 | 0.61±0.13 <sup>a</sup>            | 0.44±0.23 <sup>b</sup>  | 0.34±0.01 <sup>c</sup>  | 0.19±0.08 <sup>e</sup>  | 0.24±0.04 <sup>d</sup>  |
| 10          | Nonanal                            | 23.73 | 20.48±7.78 <sup>e</sup>           | 37.49±4.69 <sup>b</sup> | 36.50±3.79 <sup>c</sup> | 38.49±1.62 <sup>a</sup> | 23.80±2.97 <sup>d</sup> |
| 11          | Decanal                            | 28.76 | 5.88±2.5 <sup>e</sup>             | 10.42±0.8 <sup>b</sup>  | 10.29±0.57 <sup>c</sup> | 11.68±1.02 <sup>a</sup> | 6.56±0.32 <sup>d</sup>  |
| 12          | Undecanal                          | 33.19 | 1.15±0.24 <sup>c</sup>            | 1.35±0.24 <sup>a</sup>  | 1.31±0.19 <sup>b</sup>  | 1.12±0.01 <sup>d</sup>  | 1.08±0.23 <sup>e</sup>  |
|             | Total content                      |       | 78.08                             | 91.40                   | 93.11                   | 94.63                   | 93.12                   |
|             | Ketones                            |       |                                   |                         |                         |                         |                         |
| 13          | 6-methyl-5-Hepten-2-one            | 16.47 | 1.72±0.54 <sup>a</sup>            | 0.71±0.46 <sup>b</sup>  | 0.44±0.16 <sup>c</sup>  | 0.16±0.02 <sup>e</sup>  | 0.26±0.09 <sup>d</sup>  |
| 14          | 6,10-dimethyl-5,9-Undecadien-2-one | 37.14 | 0.17±0.01 <sup>a</sup>            | 0.15±0.07 <sup>b</sup>  | 0.14±0.06 <sup>b</sup>  | 0.13±0.05 <sup>c</sup>  | 0.17±0.04 <sup>a</sup>  |
|             | Total content                      |       | 1.89                              | 0.86                    | 0.58                    | 0.29                    | 0.43                    |

(Continued Table 1)

| Peak number | Volatile compounds  | RT*   | Relative content of volatiles (%) |                        |                        |                        |                        |
|-------------|---------------------|-------|-----------------------------------|------------------------|------------------------|------------------------|------------------------|
|             |                     |       | 0 min                             | 10 min                 | 20 min                 | 30 min                 | 40 min                 |
|             | Alcohols            |       |                                   |                        |                        |                        |                        |
| 15          | Butanol,3-methyl-   | 3.65  | 15.00±4.84 <sup>a</sup>           | 6.88±2.44 <sup>b</sup> | 5.62±1.00 <sup>c</sup> | 4.75±1.46 <sup>d</sup> | 5.62±1.53 <sup>c</sup> |
| 16          | 1-Octano2-          | 21.91 | 0.23±0.05 <sup>b</sup>            | 0.14±0.09 <sup>d</sup> | 0.21±0.06 <sup>b</sup> | 0.17±0.05 <sup>c</sup> | 0.63±0.25 <sup>a</sup> |
|             | Total content       |       | 15.23                             | 7.03                   | 5.82                   | 4.92                   | 6.24                   |
|             | Amines              |       |                                   |                        |                        |                        |                        |
| 17          | 2-cyano-Acetamide   | 40.56 | 0.10±0.02 <sup>a</sup>            | 0.08±0.02 <sup>a</sup> | 0.07±0.00 <sup>b</sup> | 0.10±0.01 <sup>a</sup> | 0.10±0.02 <sup>a</sup> |
| 18          | dibutyl amine       | 48.39 | 1.50±0.74 <sup>a</sup>            | nd                     | nd                     | nd                     | nd                     |
|             | Total content       |       | 1.60                              | 0.08                   | 0.07                   | 0.10                   | 0.10                   |
|             | Number of compounds |       | 18                                | 17                     | 16                     | 14                     | 14                     |

nd indicates not detected; RT \* is retention time; different letter superscript indicates significant difference between groups (P < 0.05)

**Table S2.** Eigenvalues and contribution rates of principal components

| Main Factors | Eigenvalue | Variance<br>contribution rate (%) | Cumulative<br>contribution rate (%) |
|--------------|------------|-----------------------------------|-------------------------------------|
| 1            | 8.40601    | 69.74 %                           | 69.74%                              |
| 2            | 4.14660    | 17.06%                            | 86.80%                              |
| 3            | 2.35016    | 13.06%                            | 99.86%                              |
| 4            | 1.48831    | 0.14%                             | 100.00%                             |
| 5            | 0          | 0.00%                             | 100.00%                             |
| 6            | 0          | 0.00%                             | 100.00%                             |
| 7            | 0          | 0.00%                             | 100.00%                             |
| 8            | 0          | 0.00%                             | 100.00%                             |
| 9            | 0          | 0.00%                             | 100.00%                             |
| 10           | 0          | 0.00%                             | 100.00%                             |
| 11           | 0          | 0.00%                             | 100.00%                             |
| 12           | 0          | 0.00%                             | 100.00%                             |
| 13           | 0          | 0.00%                             | 100.00%                             |
| 14           | 0          | 0.00%                             | 100.00%                             |
| 15           | 0          | 0.00%                             | 100.00%                             |
| 16           | 0          | 0.00%                             | 100.00%                             |
| 17           | 0          | 0.00%                             | 100.00%                             |
| 18           | 0          | 0.00%                             | 100.00%                             |

**Table S3.** Principal component loading matrix

| Volatile substances                | Principal Components |          |
|------------------------------------|----------------------|----------|
|                                    | 1                    | 2        |
| Pentanal                           | 7.89131              | 1.83752  |
| Hexane                             | 1.80016              | -1.30811 |
| Butanol,3-methyl-                  | 4.84574              | 0.26478  |
| Hexanal                            | 0.59059              | -1.38859 |
| Heptanal                           | -1.16173             | -2.78698 |
| 6-methyl-5-Hepten-2-one            | -0.28564             | -2.08791 |
| Octanal                            | -0.42900             | -0.48850 |
| 1-Octano                           | -1.00453             | -1.21469 |
| 2,5-Dihydroxybenzaldehyde          | -0.71676             | -0.85156 |
| Nonanal                            | 4.92833              | -0.94592 |
| Levomethol                         | -2.25604             | -0.41655 |
| Decanal                            | -1.59219             | -0.68122 |
| Undecanal                          | -1.38154             | 4.09136  |
| 6,10-dimethyl-5,9-Undecadien-2-one | -3.12083             | 2.62050  |
| 2-cyano-Acetamide                  | -2.25122             | 3.35588  |
| Cedrene                            | 7.89131              | 1.83752  |
| Hexadecane                         | 1.80016              | -1.30811 |
| 2-Butanamine                       | 4.84574              | 0.26478  |

**Table S4.** Fatty acid composition and relative content of egg yolk under different ozone treatment times

| Fatty acid (%) | 0 min                   | 10 min                   | 20 min                  | 30 min                   | 40 min                  |
|----------------|-------------------------|--------------------------|-------------------------|--------------------------|-------------------------|
| C14:0          | 0.34±0.01 <sup>a</sup>  | 0.31±0.02 <sup>a</sup>   | 0.33±0.00 <sup>a</sup>  | 0.33±0.01 <sup>a</sup>   | 0.35±0.02 <sup>a</sup>  |
| C14:1          | 0.09±0.01 <sup>b</sup>  | 0.08±0.01 <sup>a</sup>   | 0.08±0.01 <sup>a</sup>  | 0.09±0.00 <sup>a</sup>   | 0.08±0.01 <sup>a</sup>  |
| C16:0          | 26.89±0.04 <sup>b</sup> | 27.06±0.09 <sup>ab</sup> | 26.93±0.10 <sup>b</sup> | 27.11±0.21 <sup>ab</sup> | 28.76±1.37 <sup>a</sup> |
| C16:1          | 3.84±0.01 <sup>b</sup>  | 3.86±0.01 <sup>ab</sup>  | 3.80±0.01 <sup>b</sup>  | 3.84±0.01 <sup>b</sup>   | 4.08±0.16 <sup>a</sup>  |
| C17:1          | 0.08±0.05 <sup>a</sup>  | 0.00±0.00 <sup>b</sup>   | 0.00±0.00 <sup>b</sup>  | 0.00±0.00 <sup>b</sup>   | 0.11±0.01 <sup>a</sup>  |
| C18:0          | 8.52±0.03 <sup>b</sup>  | 8.26±0.04 <sup>b</sup>   | 8.60±0.05 <sup>b</sup>  | 8.40±0.14 <sup>b</sup>   | 9.14±0.42 <sup>a</sup>  |
| C18:1n9c       | 41.47±0.15 <sup>a</sup> | 41.53±0.22 <sup>a</sup>  | 41.42±0.09 <sup>a</sup> | 41.07±0.26 <sup>b</sup>  | 37.01±3.18 <sup>c</sup> |
| C18:1          | 2.36±0.04 <sup>b</sup>  | 2.40±0.19 <sup>ab</sup>  | 2.56±0.22 <sup>ab</sup> | 2.86±0.27 <sup>a</sup>   | 2.58±0.19 <sup>ab</sup> |
| C18:2n6c       | 12.53±0.02 <sup>b</sup> | 12.58±0.01 <sup>ab</sup> | 12.50±0.02 <sup>b</sup> | 12.57±0.09 <sup>ab</sup> | 13.36±0.60 <sup>a</sup> |
| C18:3n6        | 0.11±0.07 <sup>a</sup>  | 0.12±0.08 <sup>a</sup>   | 0.00±0.07 <sup>b</sup>  | 0.00±0.00 <sup>b</sup>   | 0.12±0.01 <sup>a</sup>  |
| C18:3n3        | 0.27±0.01 <sup>a</sup>  | 0.27±0.02 <sup>a</sup>   | 0.28±0.01 <sup>a</sup>  | 0.25±0.02 <sup>a</sup>   | 0.29±0.00 <sup>a</sup>  |
| C20:1          | 0.14±0.01 <sup>b</sup>  | 0.15±0.10 <sup>b</sup>   | 0.14±0.01 <sup>b</sup>  | 0.15±0.00 <sup>b</sup>   | 0.30±0.11 <sup>a</sup>  |
| C20:2          | 0.00±0.00 <sup>c</sup>  | 0.25±0.10 <sup>a</sup>   | 0.26±0.01 <sup>a</sup>  | 0.17±0.09 <sup>b</sup>   | 0.24±0.04 <sup>a</sup>  |
| C20:3n6        | 0.14±0.09 <sup>a</sup>  | 0.00±0.00 <sup>b</sup>   | 0.00±0.00 <sup>b</sup>  | 0.00±0.00 <sup>b</sup>   | 0.17±0.02 <sup>a</sup>  |
| C20:4n6        | 2.03±0.00 <sup>b</sup>  | 2.04±0.00 <sup>b</sup>   | 2.03±0.01 <sup>b</sup>  | 2.05±0.03 <sup>b</sup>   | 2.15±0.01 <sup>a</sup>  |
| C24:0          | 0.63±0.00 <sup>a</sup>  | 0.51±0.01 <sup>b</sup>   | 0.52±0.01 <sup>b</sup>  | 0.54±0.01 <sup>b</sup>   | 0.65±0.01 <sup>a</sup>  |
| C22:6          | 0.56±0.01 <sup>b</sup>  | 0.58±0.01 <sup>ab</sup>  | 0.56±0.00 <sup>b</sup>  | 0.57±0.01 <sup>ab</sup>  | 0.60±0.02 <sup>a</sup>  |

Different letter superscripts indicate significant differences between groups ( $P < 0.05$ ).

**Table S5.** Eigenvalues and contribution rates of principal components

| Main Factors | Eigenvalue | Variance<br>contribution rate (%) | Cumulative<br>contribution rate (%) |
|--------------|------------|-----------------------------------|-------------------------------------|
| 1            | 9.22447    | 51.25%                            | 51.25%                              |
| 2            | 2.69970    | 15.00%                            | 66.25%                              |
| 3            | 2.08240    | 11.57%                            | 77.81%                              |
| 4            | 1.35853    | 7.55%                             | 85.36%                              |
| 5            | 0.93095    | 5.17%                             | 90.53%                              |
| 6            | 0.79928    | 4.44%                             | 94.97%                              |
| 7            | 0.59058    | 3.28%                             | 98.26%                              |
| 8            | 0.17929    | 1.00%                             | 99.25%                              |
| 9            | 0.13480    | 0.75%                             | 100.00%                             |
| 10           | 0          | 0.00%                             | 100.00%                             |
| 11           | 0          | 0.00%                             | 100.00%                             |
| 12           | 0          | 0.00%                             | 100.00%                             |
| 13           | 0          | 0.00%                             | 100.00%                             |
| 14           | 0          | -0.00%                            | 100.00%                             |
| 15           | 0          | -0.00%                            | 100.00%                             |
| 16           | 0          | -0.00%                            | 100.00%                             |
| 17           | 0          | -0.00%                            | 100.00%                             |

**Table S6.** Principal component loading matrix

| Fatty acid | Principal Components |          |
|------------|----------------------|----------|
|            | 1                    | 2        |
| C14:0      | -0.64321             | 0.84859  |
| C14:1      | -1.79145             | 0.20950  |
| C16:0      | -1.21733             | 0.52905  |
| C16:1      | -1.23354             | -0.85722 |
| C17:1      | -1.46682             | -0.65688 |
| C18:0      | -1.35018             | -0.75705 |
| C18:1n9c   | -1.61156             | -1.06749 |
| C18:1      | -0.42122             | 3.32565  |
| C18:2n6c   | -1.01639             | 1.12908  |
| C18:3n6    | -0.70039             | -3.81897 |
| C18:3n3    | -1.21460             | 0.79976  |
| C20:1      | -0.95749             | -1.50960 |
| C20:2      | 9.54032              | -0.60066 |
| C20:3n6    | -0.45754             | 1.81770  |
| C20:4n6    | 4.54139              | 0.60852  |
| C24:0      | -0.64321             | 0.84859  |
| C22:6      | -1.79145             | 0.20950  |
